# Supplementary material for: Genome-Wide Association Study Reveals Marker Trait Associations (MTA) for Waterlogging-Triggered Adventitious Roots and Aerenchyma Formation in Barley
Source: MDPI journal article supplement (doi:10.3390/ijms23063341), 2022-03-19
Supplement: s1 [file s1]

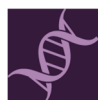

Article

# Genome-wide association study reveals marker trait associations (MTA) for waterlogging-triggered adventitious roots and aerenchyma formation in barley

S M Nuruzzaman Manik, Md Quamruzzaman, Chenchen Zhao, Peter Johnson, Ian Hunt, Sergey Shabala, Meixue Zhou\*

## Supplementary tables

**Table S1:** List of the varieties with waterlogging tolerance

| a) Tolerant line with large amount of AR and a higher proportion of RCA formation                                                                                                                                                                                                         | b) Tolerant lines with a high number of AR but poor ability for RCA formation                                                                                                                                       | c) Intolerant lines with a less number of AR and a high proportion of RCA                     | d) Intolerant lines with limited AR and limited proportion of RCA formation                                                                                                                                                         |
|-------------------------------------------------------------------------------------------------------------------------------------------------------------------------------------------------------------------------------------------------------------------------------------------|---------------------------------------------------------------------------------------------------------------------------------------------------------------------------------------------------------------------|-----------------------------------------------------------------------------------------------|-------------------------------------------------------------------------------------------------------------------------------------------------------------------------------------------------------------------------------------|
| B1079<br>B689<br>B797<br>HOR 4052<br>Kikai Hadaka<br>Kinai 8<br>REKA 1<br>Ricardo<br>Rika*(Balder*(Binder*Opal))<br>Russian 81<br>Shanghai 7<br>SM081413<br>Spanish landrace 309d<br>TAM402762<br>TAM407227<br>Tayeh 9<br>USA 8330-1679<br>WA10997<br>YERONG<br>XZ-2<br>Yipingsilengdamai | ARIMONT<br>Atribut<br>B779<br>BVA-9<br>BVC-10<br>BVC-3<br>Corvette<br>HOR 13447<br>Noire Maroc<br>181P94/1/3/1/1/1-2<br>20 UM<br>200 SM1 Barley 3002<br>261B1<br>2B03-3604<br>309T1<br>327Z1<br>67 UM<br>97IWFBC 12 | Chengchou 5<br>MAR-82-E1138<br>Nord<br>Vanessa<br>X30<br>XVB19<br>X97<br>Yan 95221<br>Zhepi 4 | Aizao 3<br>B1118<br>B1121<br>BM9845-6<br>Bolron<br>Buloke<br>BVC-21<br>Franklin<br>HOR 8850<br>K-8755<br>Kaputar<br>Linus<br>Najo nijo<br>Russian 74<br>Sahara<br>SLB 45-40<br>Spanish landrace 352<br>SR442<br>Viskosa<br>Yangpi 1 |

|                         |  |  |                          |
|-------------------------|--|--|--------------------------|
| YPSLDM<br>YRJAR<br>YYXT |  |  | zheda<br>96-696 AC-13-11 |
|-------------------------|--|--|--------------------------|

Here, genotypes are showing alphabetically in each group. Based on the combination of adventitious root development and aerenchyma formation, genotypes are clustered into four groups: (a) tolerant lines with a large amount of AR and a high proportion of RCA formation (both scores close to 1), (b) tolerant lines with a high number of AR but poor ability for RCA formation, c) intolerant lines with a less number of AR and a high proportion of RCA and (d) intolerant lines with limited AR and limited proportion of RCA (both scores approaching 10).

**Table S2:** Significant SNPs from the traits adventitious root formation and aerenchyma formation under waterlogging conditions. Output is from the Farm CPU model within rMVP.

| SNPs           | Chr      | Pos                | Effect      | SE          | <i>p-value</i>  | MTA                  | Traits            |
|----------------|----------|--------------------|-------------|-------------|-----------------|----------------------|-------------------|
| 3663961        | 1        | 501,154,892        | -1.58       | 0.35        | 7.95E-07        | MTA.WL.RCA.1H        | Aerenchyma        |
| 3987361        | 2        | 615,452,349        | 1.1         | 0.25        | 1.84E-06        | MTA.WL.RCA.2H        | Aerenchyma        |
| <b>3268328</b> | <b>2</b> | <b>672,040,513</b> | <b>0.72</b> | <b>0.13</b> | <b>4.77E-09</b> | <b>MTA.WL.AR.2H</b>  | <b>Adv. root</b>  |
| <b>3433774</b> | <b>4</b> | <b>610,891,133</b> | <b>1.03</b> | <b>0.2</b>  | <b>1.74E-08</b> | <b>MTA.WL.RCA.4H</b> | <b>Aerenchyma</b> |
| 3265960        | 5        | 7,397,268          | -0.49       | 0.12        | 1.26E-06        | MTA.WL.AR.5H         | Adv. root         |
| 5247903        | 5        | 589,500,162        | 0.48        | 0.11        | 2.68E-06        | MTA.WL.AR.5H         | Adv. root         |
| 4790180        | 6        | 35,557,165         | 0.62        | 0.13        | 3.05E-07        | MTA.WL.AR.6H         | Adv. root         |
| 3913494        | 6        | 157,415,479        | 1.5         | 0.31        | 3.49E-07        | MTA.WL.RCA.6H        | Aerenchyma        |
| 3266637        | 6        | 454,298,579        | -0.57       | 0.12        | 4.94E-07        | MTA.WL.AR.6H         | Adv. root         |
| 3272551        | 6        | 548,336,242        | -0.65       | 0.16        | 2.81E-06        | MTA.WL.RCA.6H        | Aerenchyma        |
| 3271458        | 7        | 622,004,991        | -0.86       | 0.18        | 1.81E-07        | MTA.WL.AR.7H         | Adv. root         |

Note: RCA= root cortical aerenchyma, AR=adventitious roots, Chr=chromosome, Pos=position; highlighted SNPs are the lead SNPs.

**Table S3:** Chromosomes, identified MTAs, traits, gene probe with position, and candidate genes family with number of genes in each family inside the bracket

|                      | <u>Gene probe</u> | <u>Start</u> | <u>End</u> | <u>Candidate genes</u>                             |
|----------------------|-------------------|--------------|------------|----------------------------------------------------|
| <b>Chr 1H</b>        |                   |              |            |                                                    |
| <b>3663961 (RCA)</b> | HORVU1Hr1G075000  | 509,572191   | 509,576703 | RNA-binding domain superfamily (28)                |
|                      | HORVU1Hr1G075040  | 509,584938   | 509,587493 | AP2/ERF domain superfamily (3)                     |
| <b>Chr 2H</b>        |                   |              |            |                                                    |
| <b>3987361 (RCA)</b> | HORVU2Hr1G085120  | 615,297889   | 615,300905 | Mitochondrial pyruvate carrier (2)                 |
|                      | HORVU2Hr1G085160  | 615,601770   | 615,606669 | MFS transporter superfamily (10)                   |
|                      | HORVU2Hr1G085260  | 616,726973   | 616,730834 | MFS transporter superfamily (5)                    |
| <b>3268328 (AR)</b>  | HORVU2Hr1G095950  | 672,302733   | 672,303606 | Protein kinase-like domain superfamily (2)         |
|                      | HORVU2Hr1G096350  | 674,144117   | 674,153272 | Protein kinase-like domain superfamily (10)        |
|                      | HORVU2Hr1G096360  | 674,156049   | 674,158319 | Aquaporin transporter (16)                         |
| <b>Chr 4H</b>        |                   |              |            |                                                    |
| <b>3433774 (RCA)</b> | HORVU4Hr1G079150  | 611,346020   | 611,350289 | Potassium transporter (11)                         |
|                      | HORVU4Hr1G079630  | 613,053925   | 613,054630 | AP2/ERF domain superfamily (1)                     |
| <b>Chr 5H</b>        |                   |              |            |                                                    |
| <b>3265960 (AR)</b>  | HORVU5Hr1G003910  | 7,397268     | 7,479956   | HAD superfamily protein (10)                       |
| <b>5247903 (AR)</b>  | HORVU5Hr1G092140  | 587,616646   | 587,617430 | FHY3/FAR1 family (1)                               |
|                      | HORVU5Hr1G093350  | 591,497184   | 591,501786 | MFS transporter superfamily (20)                   |
|                      | HORVU5Hr1G093390  | 591,633650   | 591,639220 | MFS transporter superfamily (4)                    |
|                      | HORVU5Hr1G093410  | 591,713561   | 591,715345 | Leucine-rich repeat domain superfamily (1)         |
| <b>Chr 6H</b>        |                   |              |            |                                                    |
| <b>4790180 (AR)</b>  | HORVU6Hr1G016280  | 36,393078    | 36,393505  | Acyl-CoA binding protein superfamily (2)           |
|                      | HORVU6Hr1G016380  | 36882844     | 36884841   | Protein kinase-like domain superfamily (1)         |
| <b>3913494 (RCA)</b> | HORVU6Hr1G033670  | 155,477941   | 155,487662 | Leucine-rich repeat domain superfamily (6)         |
| <b>3266637 (AR)</b>  | HORVU6Hr1G066000  | 455,535975   | 455,539510 | Myb domain (5)                                     |
|                      | HORVU6Hr1G066120  | 456,650915   | 456,654778 | Protein kinase-like domain superfamily (4)         |
| <b>3272551 (RCA)</b> | HORVU6Hr1G082510  | 548,585389   | 548,594631 | Heat shock protein 70kD, peptide-binding dom. (10) |
|                      | HORVU6Hr1G082600  | 548,778315   | 548,780586 | Heat shock protein 70kD, peptide-binding dom. (4)  |
|                      | HORVU6Hr1G082820  | 549,583705   | 549,589117 | AP2/ERF domain superfamily (1)                     |
|                      | HORVU6Hr1G082840  | 549,672098   | 549,674625 | AP2/ERF domain superfamily (1)                     |
|                      | HORVU6Hr1G082880  | 549,919842   | 549,923137 | AP2/ERF domain superfamily (5)                     |
| <b>Chr 7H</b>        |                   |              |            |                                                    |
| <b>3271458 (AR)</b>  | HORVU7Hr1G107190  | 622,233404   | 622,235106 | Heat shock protein 70 family (2)                   |
|                      | HORVU7Hr1G107310  | 622,587535   | 622,594179 | Leucine-rich repeat domain superfamily (8)         |
|                      | HORVU7Hr1G107400  | 623,072868   | 623,082441 | Potassium transporter (32)                         |

**Table S4:** T-test results for allele effects of tolerant allele (“T”) versus susceptible allele (“S”) from adventitious root development and aerenchyma formation. The data are for the top two SNPs (i.e. the most extreme p-values from the Farm CPU analysis) for adventitious root development and aerenchyma formation, respectively. The “SNP combo” data is from varieties which have either both respective tolerant alleles, or both respective sensitive alleles. The tests are simple t-tests for a difference in means (so the p-values differ from the more complex Farm CPU model). The base data for the tests is displayed in Figure 5.

*Adventitious root t-test results for differences between T and S (‘T minus S’)*

|                                        | SNP 3268328   | SNP 3271458   | SNP combo     |
|----------------------------------------|---------------|---------------|---------------|
| Mean of tolerant (T)                   | 5.03          | 4.86          | 4.43          |
| Mean of susceptible (S)                | 5.75          | 5.62          | 5.80          |
| Difference in means                    | -0.72         | -0.76         | -1.38         |
| 95% confidence interval for difference | (-0.97,-0.46) | (-1.11,-0.41) | (-1.86,-0.89) |
| Degrees of freedom                     | 694           | 694           | 467           |
| <b>-log<sub>10</sub> p-value</b>       | <b>7.23</b>   | <b>4.63</b>   | <b>7.46</b>   |

*Aerenchyma t-test results for differences between T and S (‘T minus S’)*

|                                        | SNP 3913494   | SNP 3433774   | SNP combo     |
|----------------------------------------|---------------|---------------|---------------|
| Mean of tolerant (T)                   | 4.59          | 5.25          | 4.15          |
| Mean of susceptible (S)                | 6.14          | 6.38          | 6.44          |
| Difference in means                    | -1.55         | -1.13         | -2.30         |
| 95% confidence interval for difference | (-2.09,-1.01) | (-1.46,-0.79) | (-2.94,-1.65) |
| Degrees of freedom                     | 691           | 691           | 466           |
| <b>-log<sub>10</sub> p-value</b>       | <b>7.64</b>   | <b>10.12</b>  | <b>11.15</b>  |

## Supplementary figures

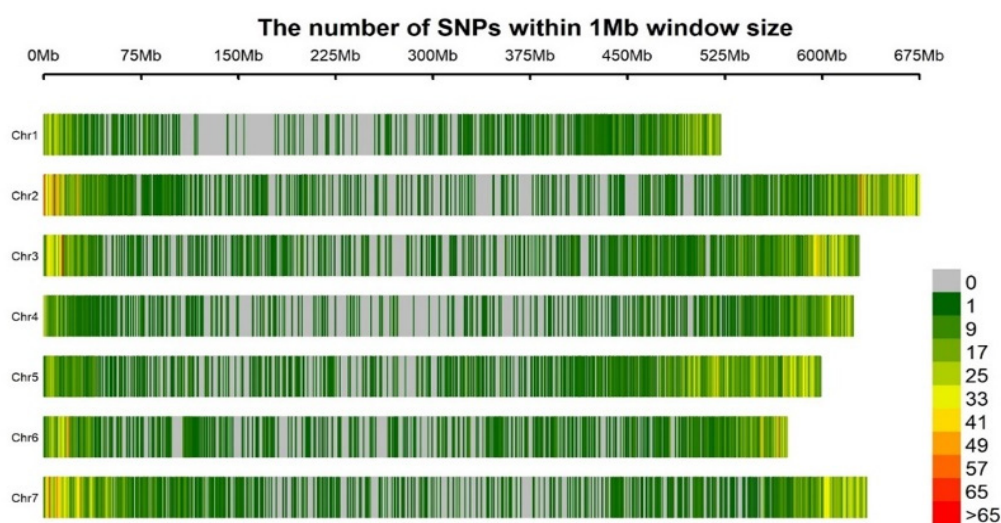

**Figure S1:** Total SNP distribution within the chromosome

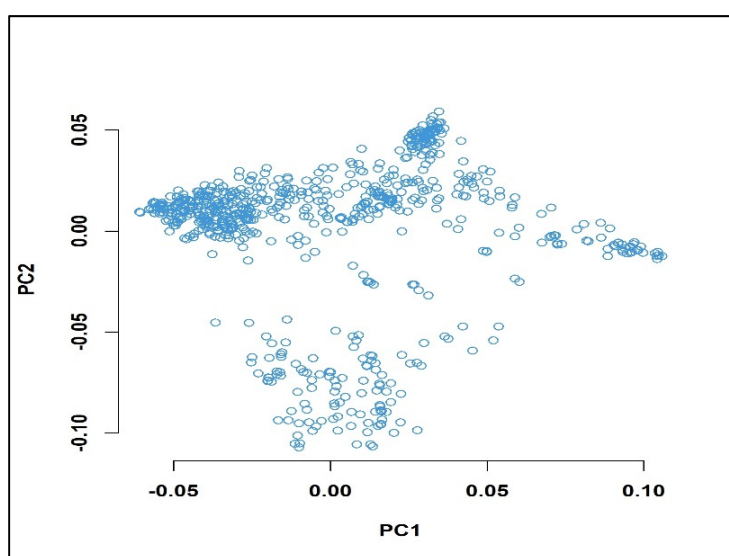

**Figure S2:** Principal component analysis

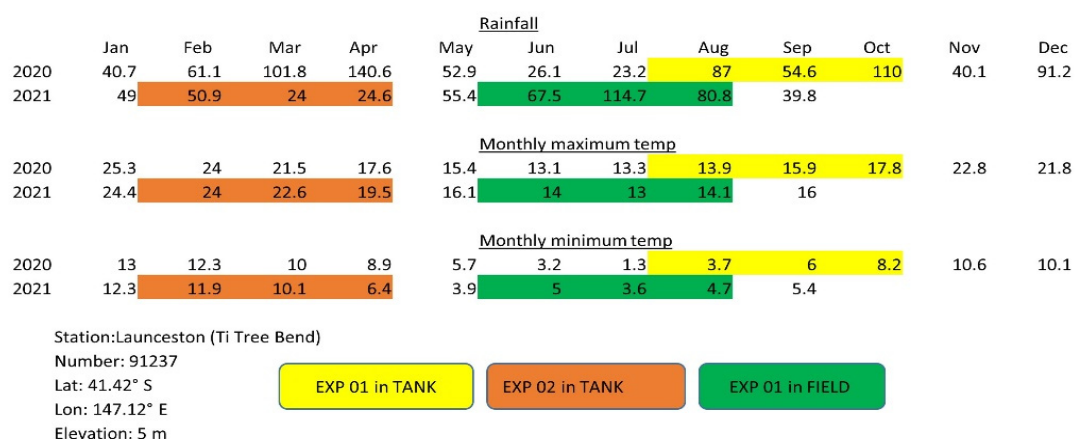

**Figure S3:** Monthly rainfall, monthly maximum temperature, and minimum temperature in tank experiments and field experiment in 2020 and 2021

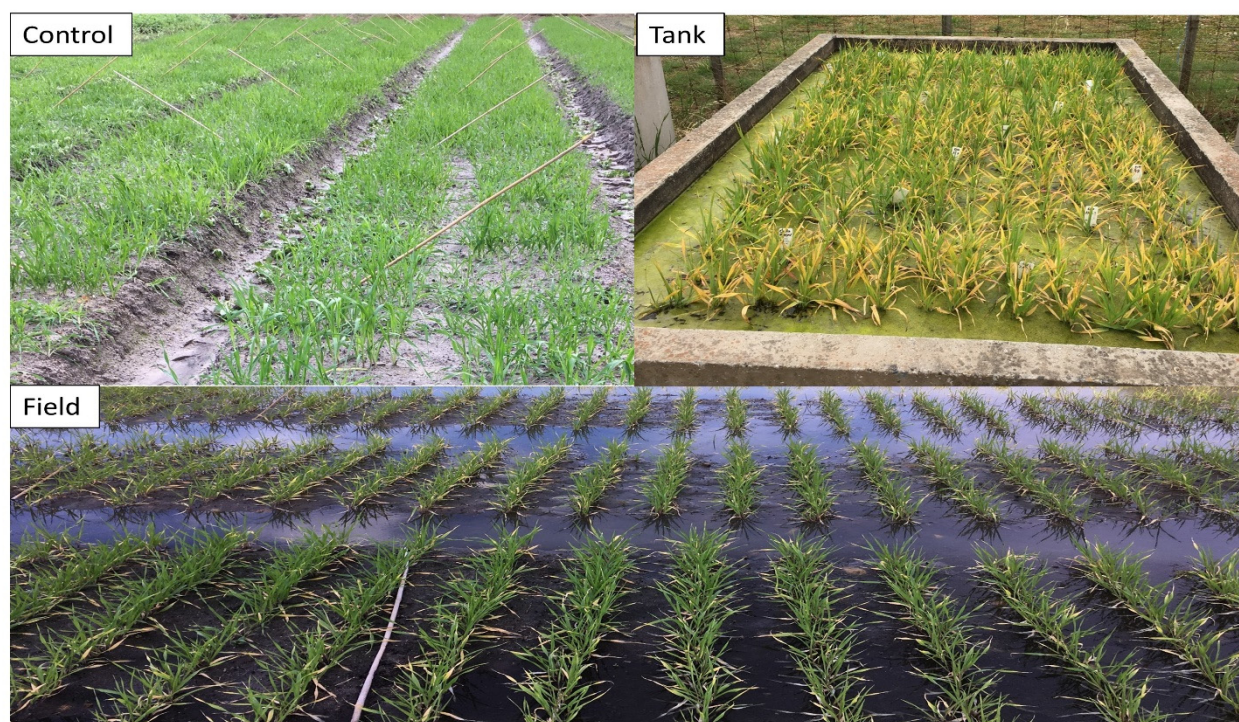

**Figure S4:** Photos of different experiments; control (non waterlogged field); waterlogged tank trial; waterlogged field trial
